# Supplementary material for: Quantification of solution-free red blood cell staining by sorption kinetics of Romanowsky stains to agarose gels
Source: Royal Society of Chemistry journal article supplement (doi:10.1039/d3ay01431b), 2023-01-01
Supplement: d3ay01431b1.pdf [file d3ay01431b1.pdf]

## Supporting Information

### Quantification of Solution-Free Red Blood Cell Staining by Sorption Kinetics of Romanowsky Stains to Agarose Gels

Chae Yun Bae<sup>1,\$,#</sup>, Hamid Esmaeili<sup>2,\$</sup>, Syed A. Zamin<sup>2</sup>, Min Jeong Seol<sup>1</sup>, Eunmi Hwang<sup>1</sup>, Suk Kyung Beak<sup>1</sup>, Younghoon Song<sup>1</sup>, Bhuvnesh Bharti<sup>3</sup> and Jangwook P. Jung<sup>2,#</sup>

1. Noul Co., Ltd. Yongin-si, Gyeonggi-do, Republic of Korea
2. Department of Biological Engineering, Louisiana State University, Baton Rouge, LA, U.S.A.
3. Cain Department of Chemical Engineering, Louisiana State University, Baton Rouge, LA, U.S.A.

<sup>\$</sup>These authors contributed equally.

<sup>#</sup>Co-corresponding authors

## Supplementary Figures

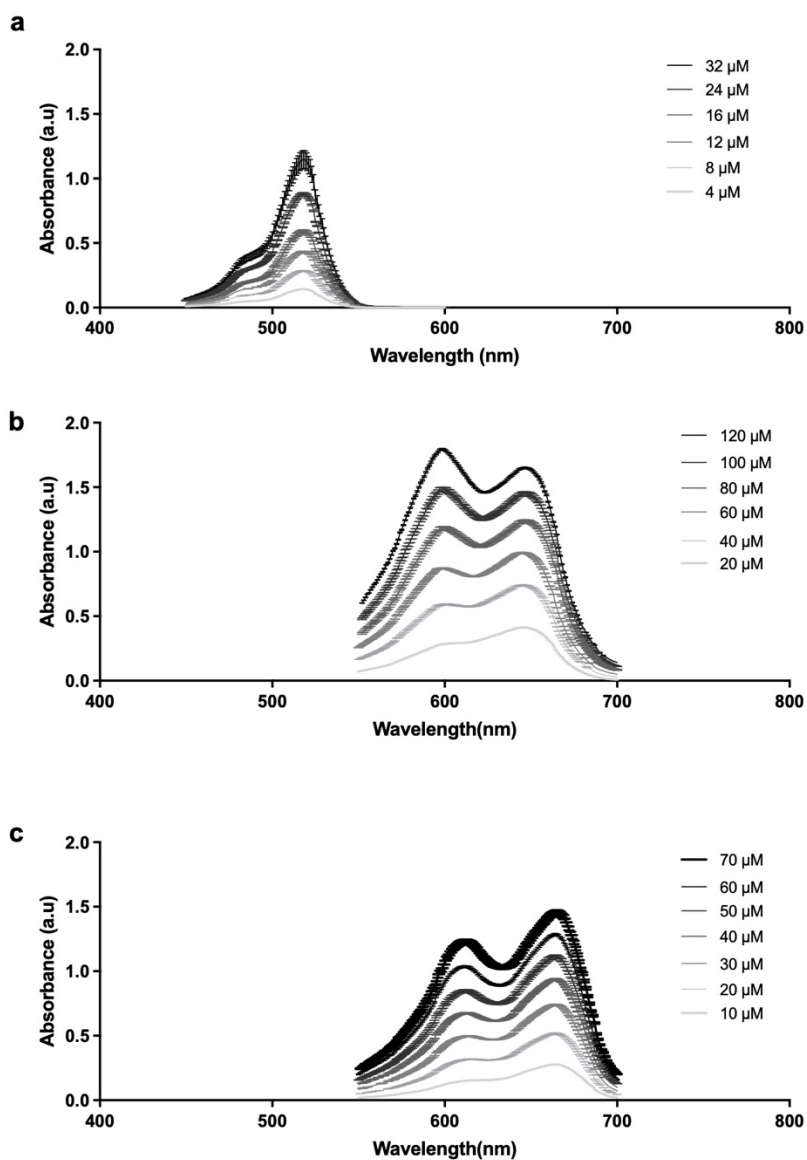

**Figure S1. Spectral scanning.** Individual Romanowsky dye solutions at different concentrations scanned from 450 to 700 nm. EY (a), AZB (b) and MB (c).

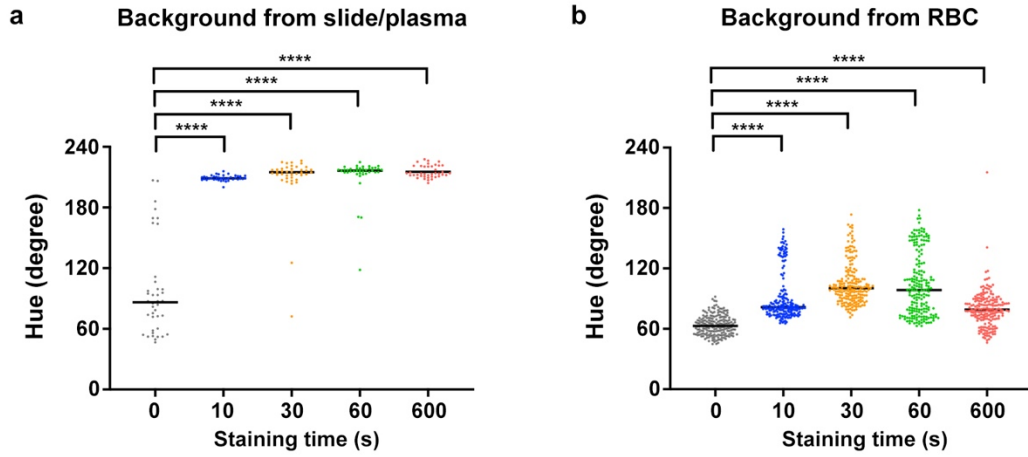

**Figure S2. Distribution of values of hue (H) respect to different periods of staining and destaining of blood cells.** (a) H of plasma after staining, n=3 samples and 40 randomly selected empty ROIs without RBCs in each column. (b) H of RBCs after staining; n=3 samples and 198 RBCs in each column. One way ANOVA with Dunnett's multiple comparison tests, \*\*\*\*p<0.0001. Scatter dot plot with mean.

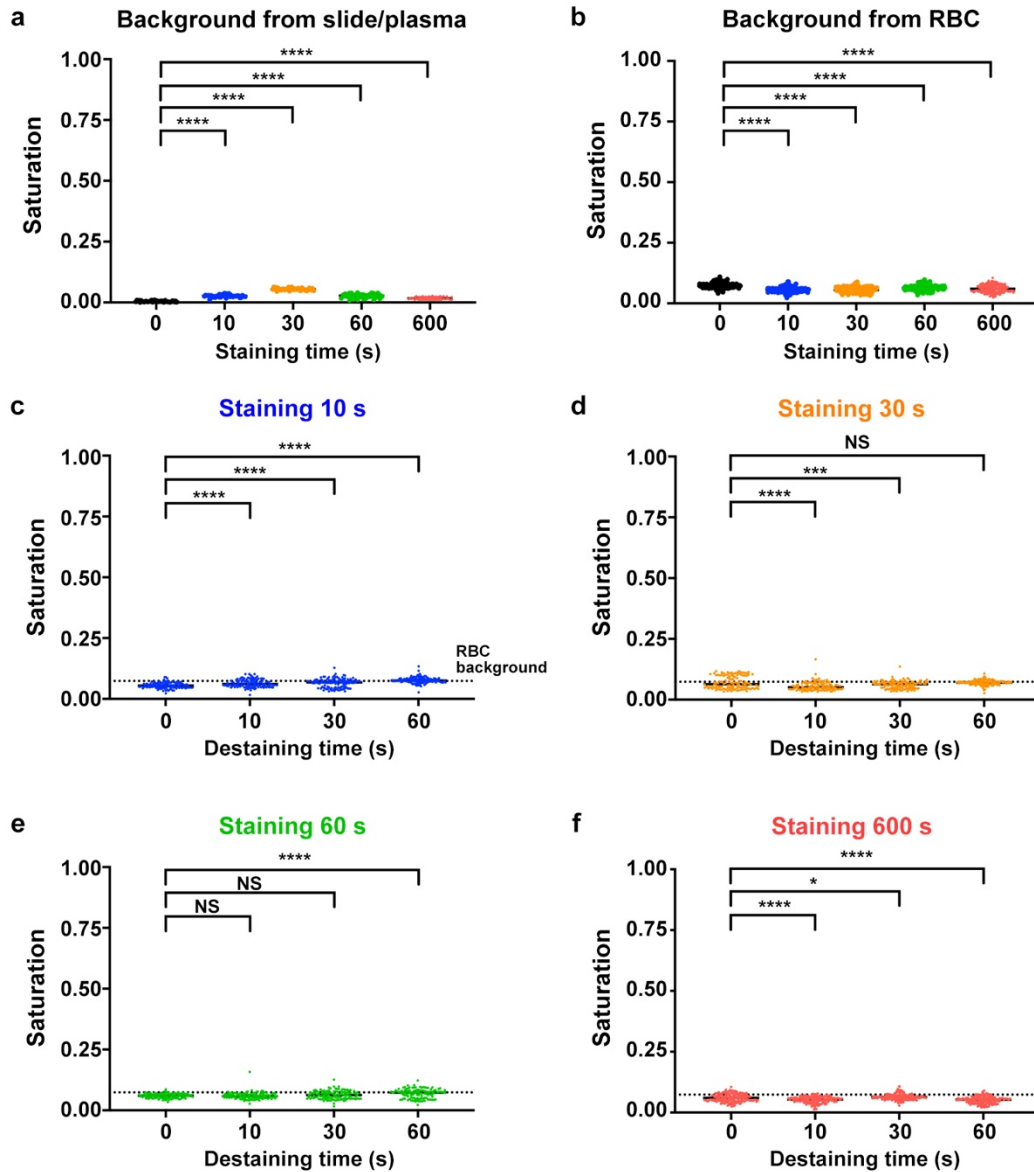

**Figure S3. Distribution of values of saturation (S) with respect to different periods of staining and destaining of blood cells.** (a) S of plasma after staining, n=3 samples and 40 randomly selected empty ROIs without RBCs in each column. (b) S of RBCs after staining; n=3 samples and 198 RBCs in each column. In (c-f), destaining was performed for 10 s, 30 s and 60 s after 10 s, 30 s, 60 s and 600 s of staining. One way ANOVA with Dunnett's multiple comparison tests, \*\*\*\*p<0.0001, \*\*\*p<0.001 and NS (non-significant). Scatter dot plot with mean.

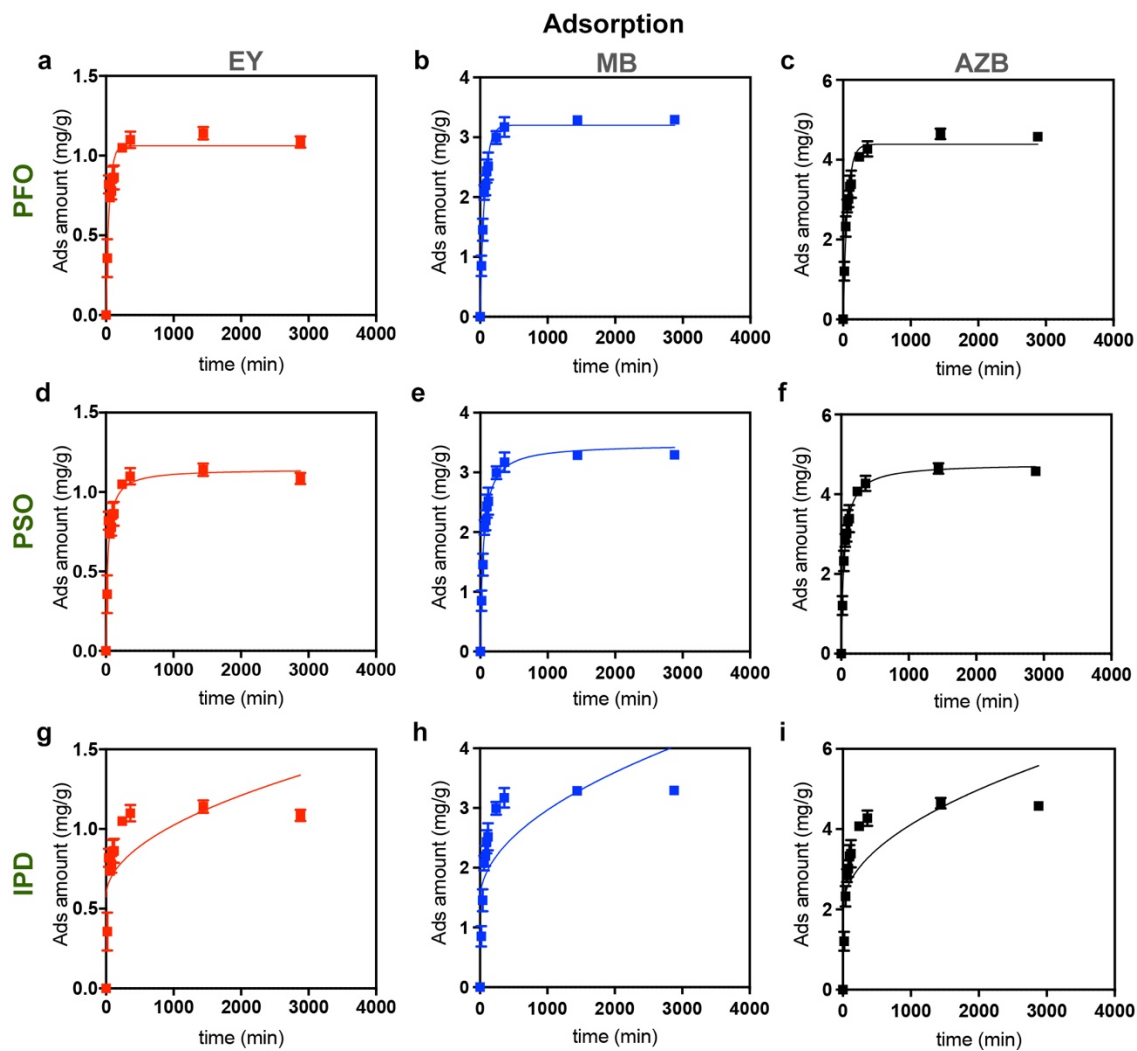

**Figure S4. Three different models of adsorption kinetics.** At a fixed concentration of the ternary mixture (EY 3.5  $\mu\text{M}$ ; MB 70  $\mu\text{M}$ ; AZB 140  $\mu\text{M}$ ), kinetics of adsorption (destaining) over 48 h was measured and fitted with PFO (pseudo-first order, a-c), PSO (pseudo-second order, d-f) and IPD (intraparticle diffusion, g-i) models; mean  $\pm$  SD, n=5.

a Varying red (EY) agarose gel stamping

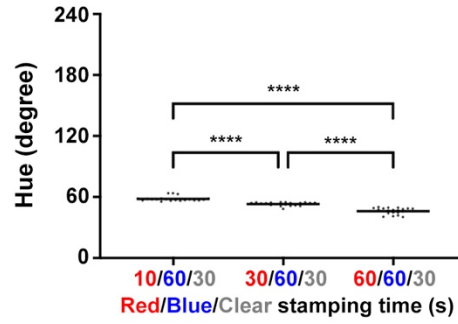

b Varying blue (MB/AZB) agarose gel stamping

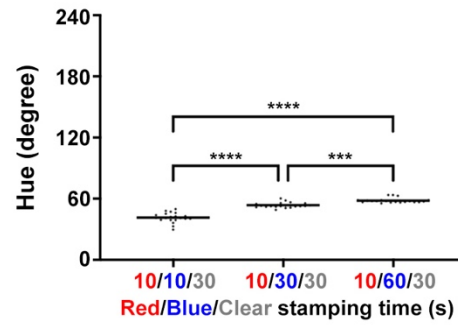

c Varying clear agarose gel stamping

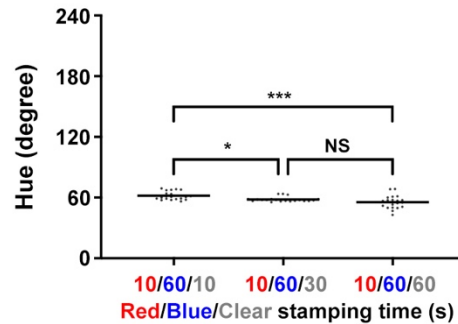

**Figure S5. Distribution of background values of hue (H) with respect to different periods of staining and destaining of blood cells with hydrogel stamps.** H of slide/plasma after staining and destaining with varying time of (a) red (EY), (b) blue (MB/AZB) and (c) clear agarose gels; n=3 samples and 20 randomly selected empty ROIs without RBCs in each column. Staining and destaining periods are denoted in each column. One way ANOVA with Tukey's *post hoc* tests, \*\*\*\*p<0.0001, \*\*\*p<0.001, \*p<0.05 and NS (non-significant). Scatter dot plot with mean.

a Varying red (EY) agarose gel stamping

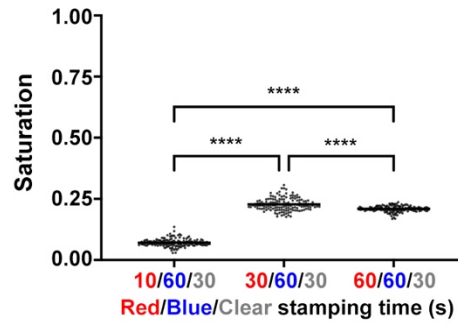

b Varying blue (MB/AZB) agarose gel stamping

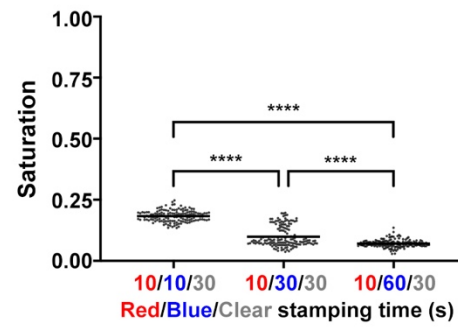

c Varying clear agarose gel stamping

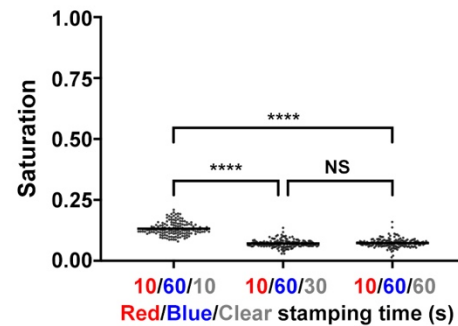

**Figure S6. Distribution of values of saturation (S) with respect to different periods of staining and destaining of blood cells with hydrogel stamps.** S of RBCs after staining and destaining with varying time of (a) red (EY), (b) blue (MB/AZB) and (c) clear agarose gels; n=3 samples and a total of 150 RBCs in each column. Staining and destaining periods are denoted in each column. One way ANOVA with Tukey's *post hoc* tests, \*\*\*\*p<0.0001 and NS (non-significant). Scatter dot plot with mean.

## Supplementary Tables

**Table S1.** Parameters of kinetics models represented in Figure S4.

| Model                                               | Parameters                        | Adsorption |         |         |
|-----------------------------------------------------|-----------------------------------|------------|---------|---------|
|                                                     |                                   | EY         | MB      | AZB     |
| Pseudo-1 <sup>st</sup> -<br>order kinetics<br>(PFO) | $Q_e$ (mg/g)                      | 1.06       | 3.20    | 4.39    |
|                                                     | $k_1$ (L min <sup>-1</sup> )      | 0.0483     | 0.0342  | 0.0355  |
|                                                     | $R^2$                             | 0.933      | 0.992   | 0.980   |
| Pseudo-2 <sup>nd</sup> -<br>order kinetics<br>(PSO) | $Q_e$ (mg/g)                      | 1.15       | 3.47    | 4.77    |
|                                                     | $k_2$ (g/mg min <sup>-1</sup> )   | 0.0285     | 0.00612 | 0.00465 |
|                                                     | $R^2$                             | 0.959      | 0.990   | 0.994   |
| Intraparticle<br>diffusion<br>(IPD)                 | $k_3$ (mg/g min <sup>-1/2</sup> ) | 0.0143     | 0.0481  | 0.0666  |
|                                                     | $C$ (mg/g)                        | 0.574      | 1.45    | 2.01    |
|                                                     | $R^2$                             | 0.437      | 0.524   | 0.547   |

**Table S2.** Parameters of the one phase decay kinetics model in Figure 7 up to 240 min.

| Model           | Parameters       | Desorption |       |       |
|-----------------|------------------|------------|-------|-------|
|                 |                  | EY         | MB    | AZB   |
| One phase decay | $Q_{max}$ (mg/g) | 1.06       | 3.24  | 4.48  |
|                 | $Q_{min}$ (mg/g) | 0.532      | 0.783 | 0.804 |
|                 | $\tau$ (min)     | 39.3       | 30.4  | 30.4  |
|                 | $R^2$            | 0.977      | 0.984 | 0.982 |

**Table S3.** Parameters of multiple kinetics models in Figure S4 up to 240 min.

| Model                                               | Parameters                        | Adsorption |         |           |
|-----------------------------------------------------|-----------------------------------|------------|---------|-----------|
|                                                     |                                   | EY         | MB      | AZB       |
| Pseudo-1 <sup>st</sup> -<br>order kinetics<br>(PFO) | $Q_e$ (mg/g)                      | 0.948      | 2.99    | 2.89      |
|                                                     | $k_1$ (L min <sup>-1</sup> )      | 0.0668     | 0.0396  | ~91300000 |
|                                                     | $R^2$                             | 0.932      | 0.994   | 0.593     |
| Pseudo-2 <sup>nd</sup> -<br>order kinetics<br>(PSO) | $Q_e$ (mg/g)                      | 1.14       | 3.79    | 4.91      |
|                                                     | $k_2$ (g/mg min <sup>-1</sup> )   | 0.0287     | 0.00451 | 0.00416   |
|                                                     | $R^2$                             | 0.944      | 0.992   | 0.993     |
| Intraparticle<br>diffusion<br>(IPD)                 | $k_3$ (mg/g min <sup>-1/2</sup> ) | 0.0677     | 0.208   | 0.277     |
|                                                     | $C$ (mg/g)                        | 0.142      | 0.156   | 0.309     |
|                                                     | $R^2$                             | 0.853      | 0.941   | 0.932     |
